# Supplementary material for: An Improved Validated Method for the Determination of Short-Chain Fatty Acids in Human Fecal Samples by Gas Chromatography with Flame Ionization Detection (GC-FID)
Source: MDPI journal article supplement (doi:10.3390/metabo13111106), 2023-10-24
Supplement: s1 [file s1]

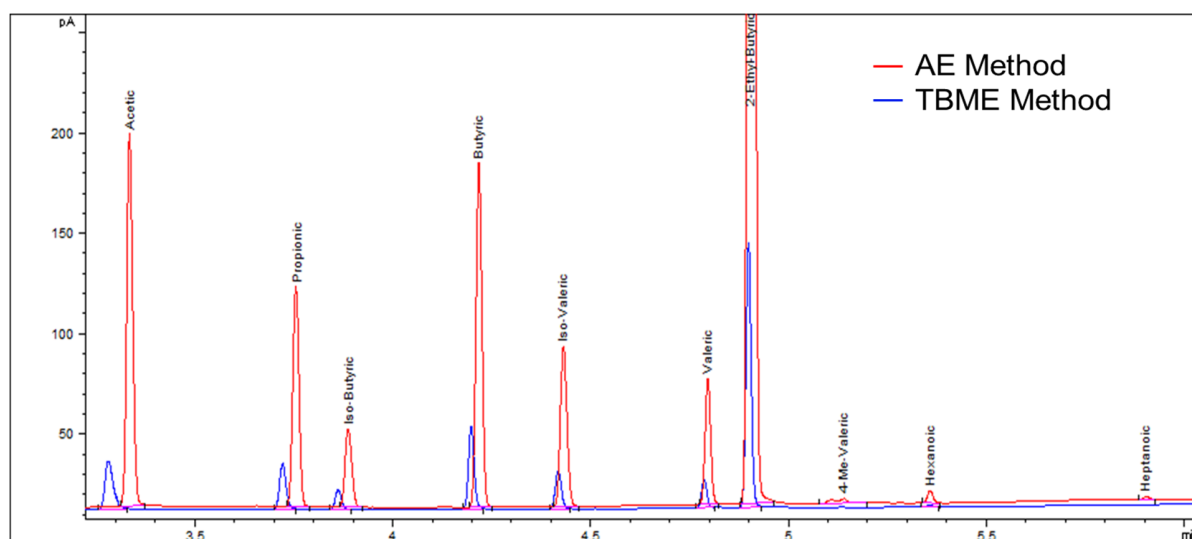

**Figure S1.** Overlay of chromatograms from samples prepared via AE method and TBME method.

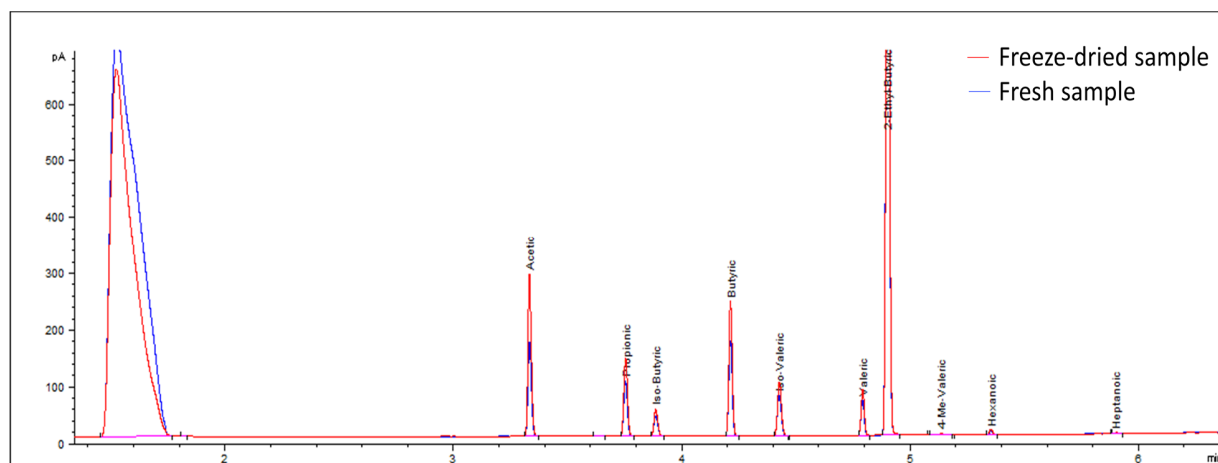

**Figure S2.** Overlay of chromatograms from samples pre-treated by freeze-drying or left fresh and extracted by AE method.
